# Supplementary material for: Sleep deprivation negatively impacts reproductive output in Drosophila melanogaster
Source: Oxford University Press journal article supplement (doi:10.1242/jeb.174771), 2018-01-01
Supplement: jeb174771supp.pdf [file jeb174771supp.pdf]

## Supplementary Information

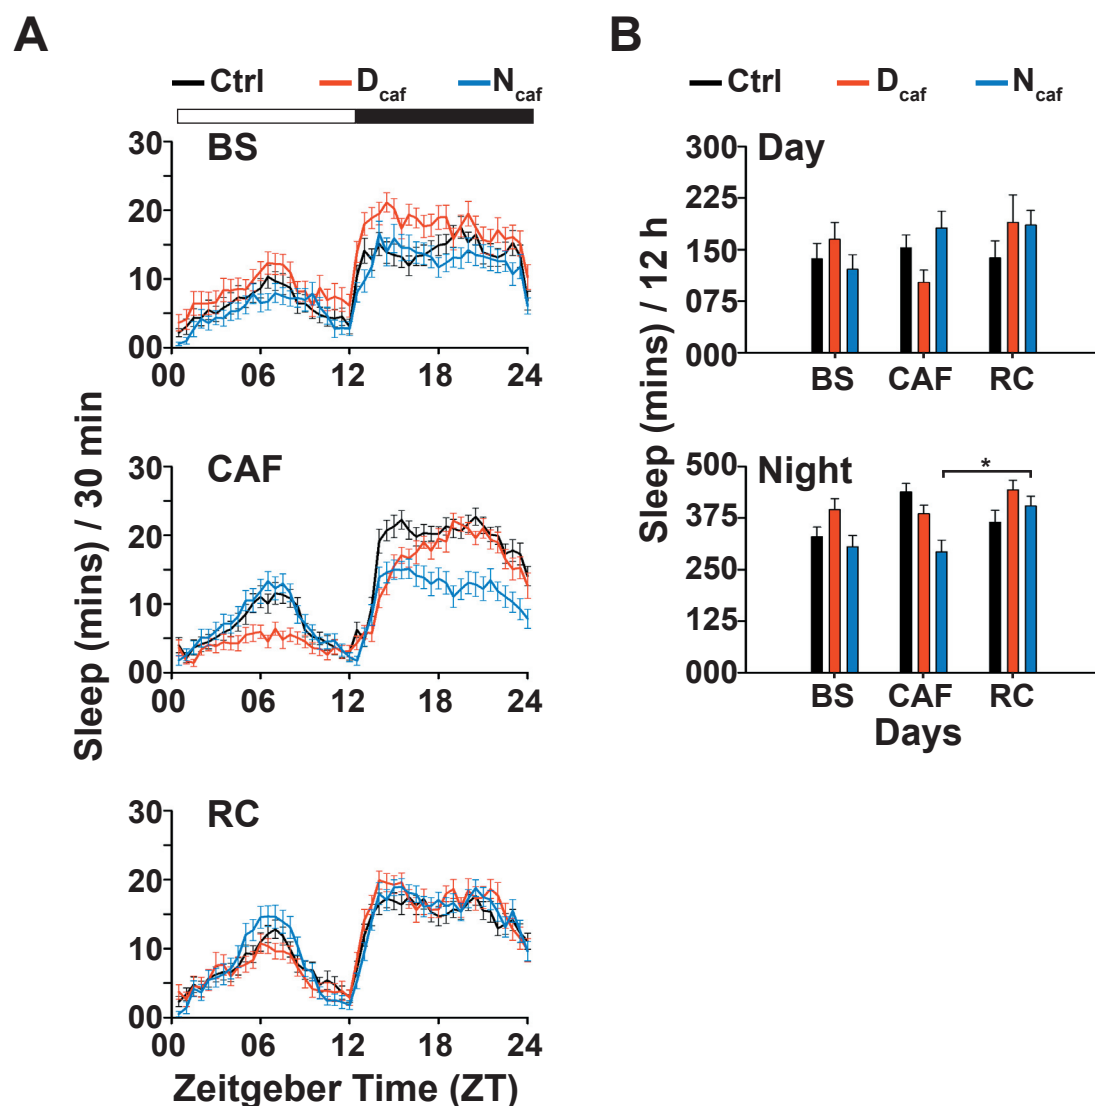

**Fig. S1.** (A) Sleep in minutes for every half hour over a period of 24 h is shown for *w<sup>1118</sup>* flies fed with standard food (Ctrl,  $n = 28$ ), flies fed with 1.0 mg/ml caffeine only during the day (D<sub>caf</sub>,  $n = 29$ ) and only during the night (N<sub>caf</sub>,  $n = 28$ ) averaged across two baseline (BS), three caffeine feeding (CAF) and two recovery (RC) days. (B) Daytime (top) and night (bottom) sleep of control, D<sub>caf</sub> and N<sub>caf</sub> flies are compared across BS, CAF and RC days. Only night sleep of N<sub>caf</sub> flies during CAF and RC days is significantly different from each other (two-way ANOVA with treatment and days as fixed factors followed by post-hoc Tukey's HSD test). All other details as in Figure 1.

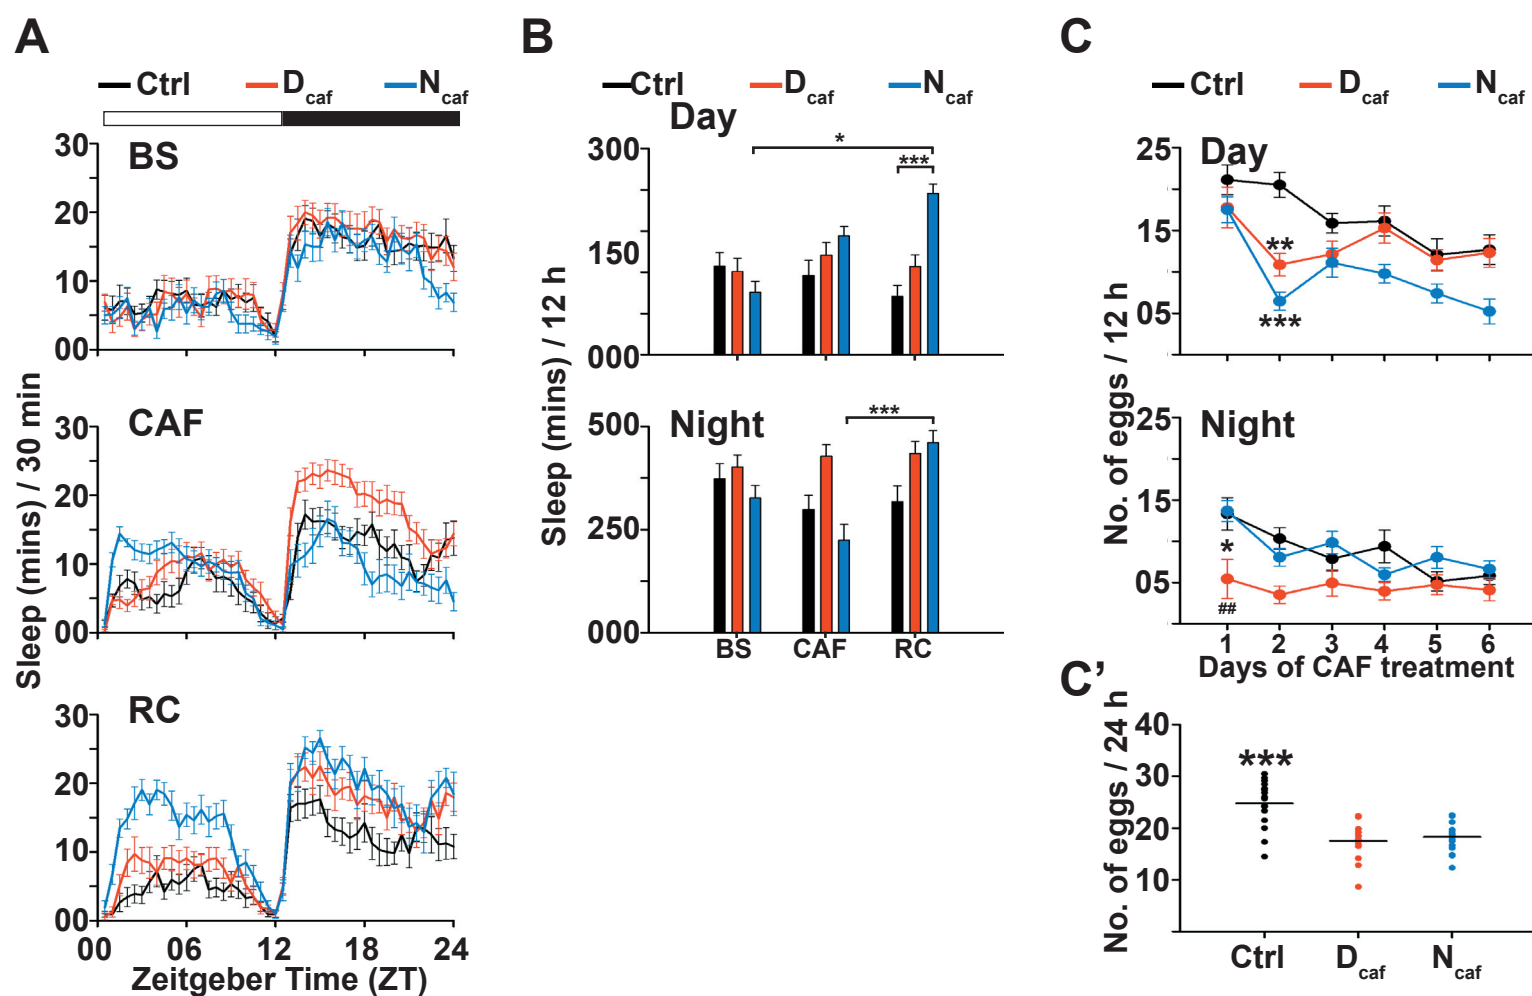

**Fig. S2.** (A) Sleep in minutes for every half hour over a period of 24 h is shown for control flies of outbred *CCM* population fed with standard food (Ctrl,  $n = 16$ ), flies fed with caffeine only during the day ( $D_{caf}$ ,  $n = 16$ ) and only during the night ( $N_{caf}$ ,  $n = 14$ ) for caffeine concentration of 4.0 mg/ml averaged across two baseline (BS), three caffeine feeding (CAF) and two recovery (RC) days. Night sleep of  $N_{caf}$  flies during CAF days is lower than that of controls, and both daytime and night sleep of  $N_{caf}$  flies is higher than the controls during RC. (B) Daytime sleep levels of control and  $D_{caf}$  flies show no differences across different days, whereas those of control and  $N_{caf}$  flies significantly differ from each other during RC. Daytime sleep of  $N_{caf}$  flies during RC is significantly higher than that during BS. Night sleep of  $N_{caf}$  flies during CAF and RC days are significantly different from each other (two-way ANOVA with treatment and days as fixed factors followed by post-hoc Tukey's HSD test). (C)  $N_{caf}$  flies showed a trend of laying lower number of eggs than controls during the daytime (top), which was significant on day 2, while  $D_{caf}$  flies showed a trend of laying lower number of eggs during the night (bottom) which was significant on night 1 (Kruskal-Wallis test). (C') Total eggs laid by control ( $n = 16$ ),  $D_{caf}$  ( $n = 14$ ) and  $N_{caf}$  ( $n = 18$ ) flies averaged across six days of caffeine feeding. Control flies laid higher number of eggs as compared to both  $D_{caf}$  and  $N_{caf}$  flies (Kruskal-Wallis test). All other details as in Figure 1.

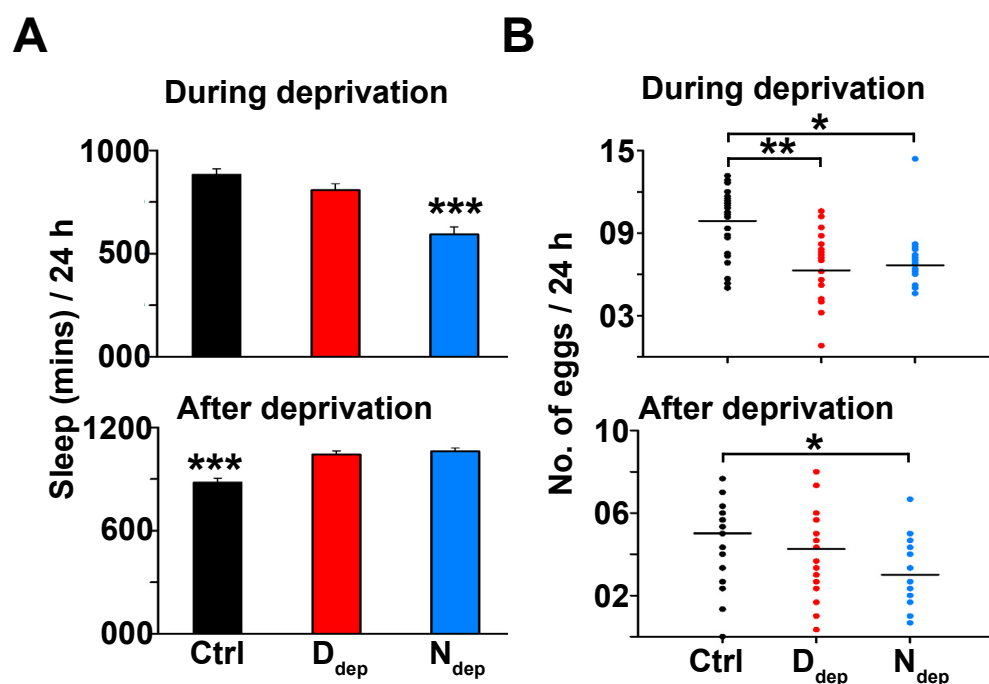

**Fig. S3.** (A) Total sleep (top) during 6 days of sleep deprivation and (bottom) averaged for 3 days post-deprivation. Sleep of N<sub>dep</sub> ( $n = 16$ ) flies is significantly lower than both control ( $n = 29$ ) and D<sub>dep</sub> ( $n = 21$ ) flies during sleep deprivation, whereas both D<sub>dep</sub> and N<sub>dep</sub> flies sleep more after deprivation (one-way ANOVA followed by post-hoc Tukey's HSD test). (B) Average number of eggs laid (top) during sleep deprivation and (bottom) after sleep deprivation. D<sub>dep</sub> and N<sub>dep</sub> flies lay lesser number of eggs as compared to control flies during deprivation, but only N<sub>dep</sub> flies lay lower number of eggs compared to control flies after deprivation (Kruskal-Wallis tests). All other details as in Figure 1.

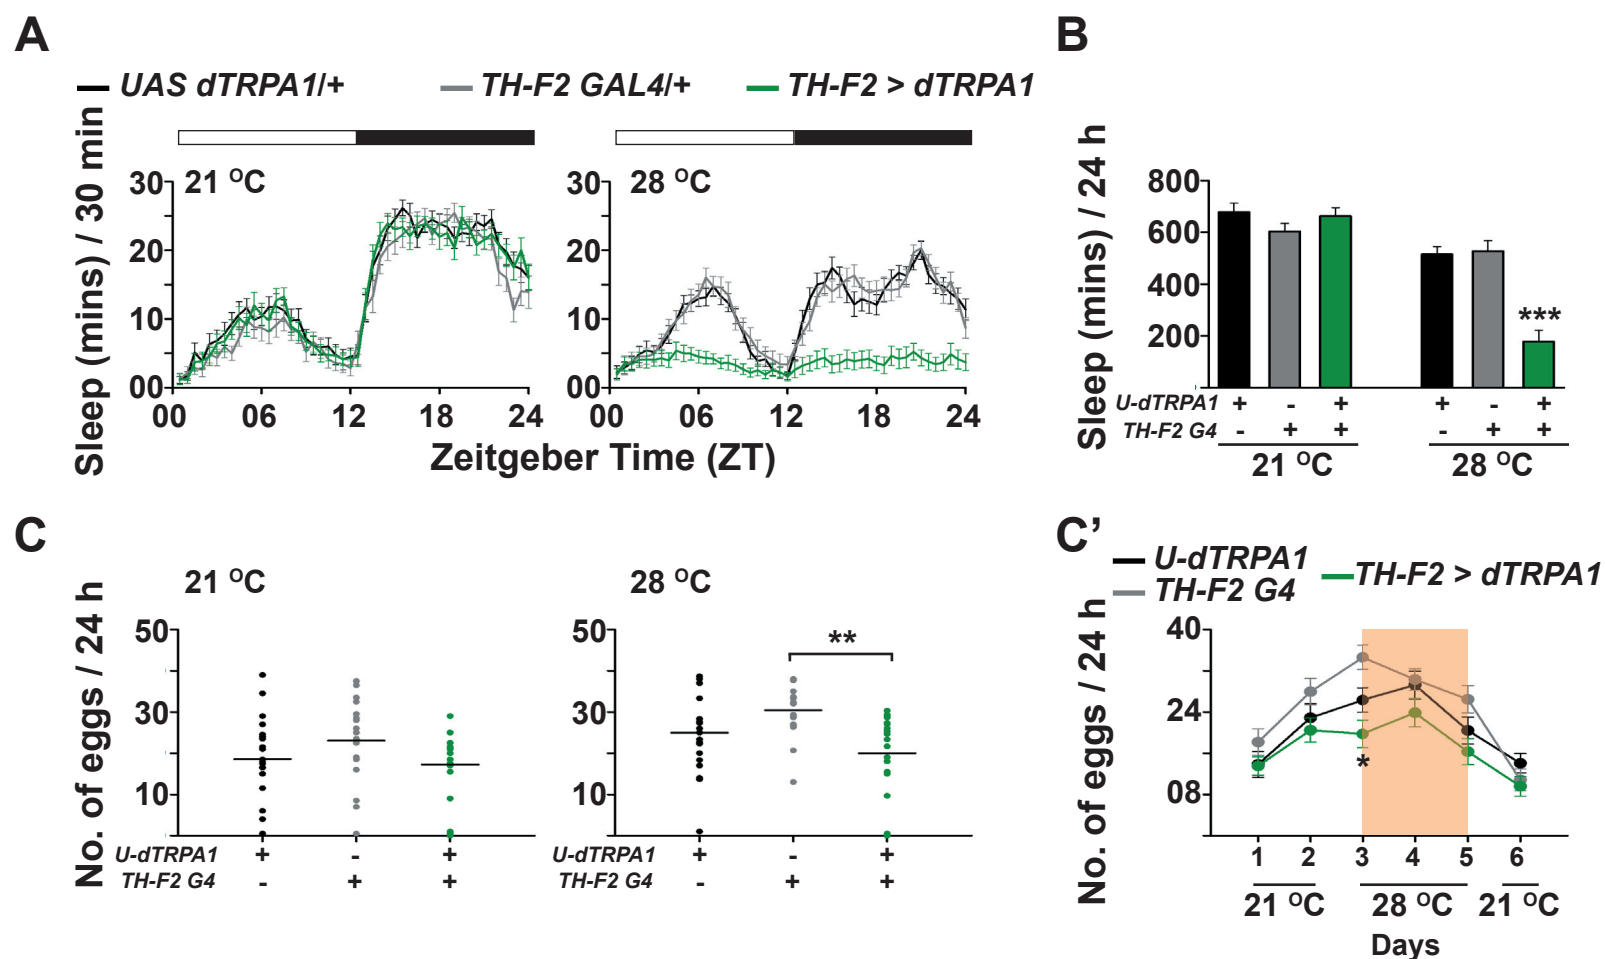

**Fig. S4.** (A) Sleep in minutes for every half hour over a period of 24 h averaged across two days at 21 °C (left) and three days at 28 °C (right) is shown for *UAS dTRPA1/+* ( $n = 22$ ), *TH-F2 GAL4/+* ( $n = 23$ ) and *TH-F2 GAL4 > UAS dTRPA1* ( $n = 23$ ) flies. (B) At 21 °C, total sleep levels of all three genotypes is similar, whereas at 28 °C, *TH-F2 GAL4 > UAS dTRPA1* flies sleep significantly less than *UAS dTRPA1/+* and *TH-F2 GAL4/+* flies (two-way ANOVA with genotype and temperature as fixed factors followed by post-hoc Tukey's HSD test). (C) Total number of eggs laid averaged across two days at 21 °C (left) is similar across all genotypes, while average number of eggs laid by *TH-F2 GAL4 > UAS dTRPA1* ( $n = 20$ ) flies is significantly lower than *TH-F2 GAL4/+* ( $n = 18$ ) flies during the three days at 28 °C, but not from *UAS dTRPA1/+* flies ( $n = 20$ ) (right, Kruskal-Wallis test). (C') Total number of eggs laid on all six days of the assay at different temperatures as indicated. *TH-F2 GAL4 > UAS dTRPA1* flies laid significantly lower number of eggs as compared to *UAS dTRPA1/+* and *TH-F2 GAL4/+* on the first day of 28 °C (Kruskal-Wallis test), while it showed a decreasing non-significant trend on the other two days of 28 °C. All flies laid similar number of eggs at 21 °C. All other details as in Figure 3.
